# Supplementary material
Source: PubMed Central journal article supplement (PMC4097633)

**FIGURE S1**

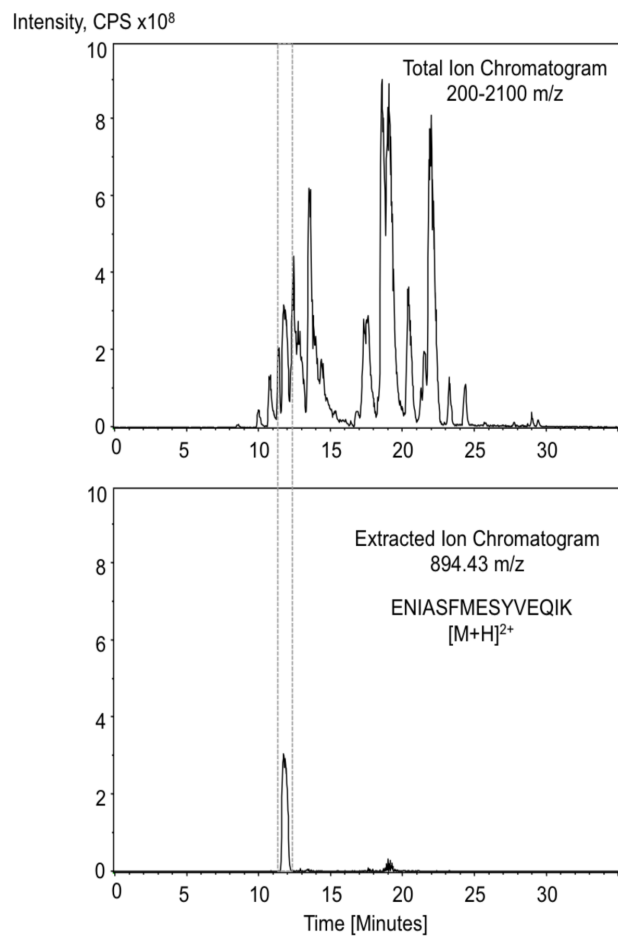

Supplement: IAI.01770-14_zii999090761so2.pdf [file IAI.01770-14_zii999090761so2.pdf]

**FIGURE S2**

**A**

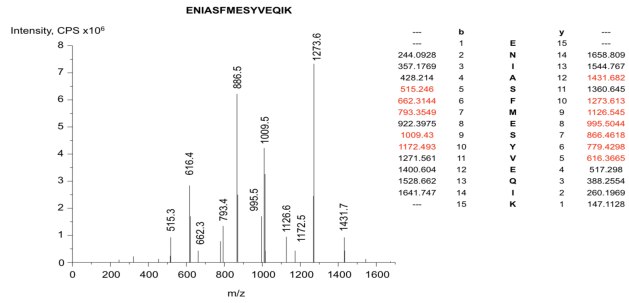

**B**

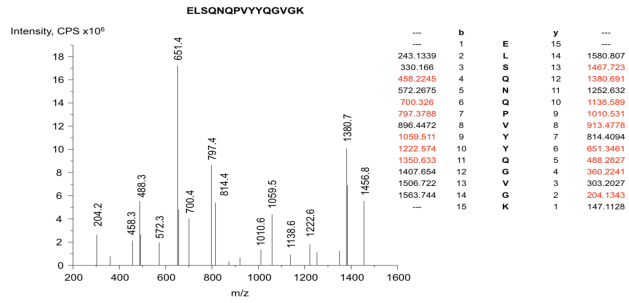

**C**

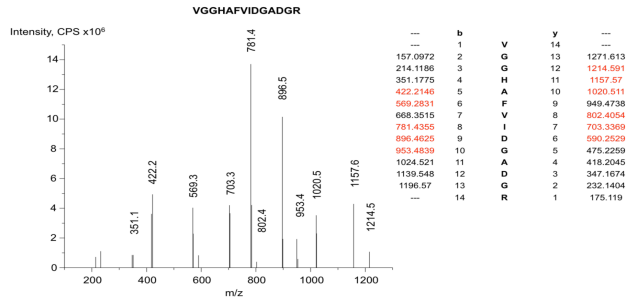

Supplement: IAI.01770-14_zii999090761so3.pdf [file IAI.01770-14_zii999090761so3.pdf]
